# Supplementary material
Source: publisher site journal article supplement (https://www.dovepress.com/article/supplementary_file/560821/560821%20Revised%20Supplementary%20Material%20Table%20S1.xlsx)
Supplement: Supplementary file 1 [file 560821%20Revised%20Supplementary%20Material%20Table%20S1.xlsx]

## Sheet: Sheet1
Table S1. Baseline Clinical Characteristics of the Study Participants
Characteristic	Healthy Controls (n=5)	Diabetic Nephropathy (DN) (n=5)	Atherosclerosis (AS) (n=5)
Demographics
Age (years)	50 (45-54)	56 (53-58)	58 (52-60)
Male, n (%)	60	60	60
Body Mass Index (kg/m²)	22.6 (3.4)	24.2 (2.6)	25.8 (3.8)
Clinical Metrics
Fasting Blood Glucose (mmol/L)	4.96 (0.32)	9.19 (1.21)	6.46 (0.24)
HbA1c (%)	5.1 (0.3)	9.2 (2.0)	6.2 (0.4)
eGFR (mL/min/1.73m²)	106.8 (4.7)	86.7 (12.3)	104.2 (5.4)
UACR (mg/g)	5.66 (2.38-7.24)	80.88 (48.54-102.86)	6.02 (2.24-7.88)
Comorbidities, n (%)
Hypertension	0	20	40
Dyslipidemia	0	0	100
Medications, n (%)
Statins	0	0	0
RAAS Blockers (ACEI/ARB)	0	20	20
Metformin	0	100	0
Insulin	0	20	0
Antiplatelet Drugs	0	0	0
